# Supplementary material for: In situ study of CdS/WO 3 and CdS/SnO 2 heterostructures: comparison of photocatalytic activity behavior
Source: Royal Society of Chemistry journal article supplement (doi:10.1039/d4ta07048h), 2025-01-01
Supplement: d4ta07048h1.pdf [file d4ta07048h1.pdf]

## Supplementary Information

### ***In-situ* Study of CdS/WO<sub>3</sub> and CdS/SnO<sub>2</sub> Heterostructures: Comparison of Photocatalytic Activity Behavior**

*Hyejin Yu,<sup>a,†</sup> Dung Thanh Hoang,<sup>b,†</sup> Hyun Sung Kim<sup>\*,a</sup>, Hangil Lee<sup>\*,b</sup>*

<sup>a</sup>Department of Chemistry, Pukyong National University, Busan 48513, Republic of Korea

<sup>b</sup>Department of Chemistry, Sookmyung Women's University, Seoul 04310, Republic of Korea

## Table of Contents

|                                                                                                                                                                                                                                                                                                                                                                                                                                    |    |
|------------------------------------------------------------------------------------------------------------------------------------------------------------------------------------------------------------------------------------------------------------------------------------------------------------------------------------------------------------------------------------------------------------------------------------|----|
| <b>Figure S1.</b> The samples of fabricated CdS/WO <sub>3</sub> (n) and CdS/SnO <sub>2</sub> (n) heterostructures (n = WO <sub>3</sub> or SnO <sub>2</sub> wt.%).<br>.....                                                                                                                                                                                                                                                         | 3  |
| <b>Figure S2.</b> Energy-dispersive X-ray spectra of CdS/WO <sub>3</sub> (50) and CdS/SnO <sub>2</sub> (50) heterostructure systems.<br>.....                                                                                                                                                                                                                                                                                      | 4  |
| <b>Figure S3.</b> SEM Image and their EDS mapping of CdS, WO <sub>3</sub> , CdS/SnO(50), CdS/WO <sub>3</sub> (50), and SnO <sub>2</sub> NPs.                                                                                                                                                                                                                                                                                       |    |
| <b>Figure S4.</b> Brunauer-Emmett-Teller analysis of CdS/WO <sub>3</sub> (n) and CdS/SnO <sub>2</sub> (n) heterostructure systems (n = WO <sub>3</sub> or SnO <sub>2</sub> wt.%).<br>.....                                                                                                                                                                                                                                         | 5  |
| <b>Figure S5.</b> Small-angle XRD patterns of (a) CdS/WO <sub>3</sub> (n) and (b) CdS/SnO <sub>2</sub> (n) heterostructure systems (n = WO <sub>3</sub> or SnO <sub>2</sub> wt.%).<br>.....                                                                                                                                                                                                                                        | 6  |
| <b>Figure S6.</b> LC-MS results of CdS/WO <sub>3</sub> (n) and CdS/SnO <sub>2</sub> (n) heterostructure systems. ....                                                                                                                                                                                                                                                                                                              | 7  |
| <b>Figure S7.</b> Photocatalytic degradation of HMF by (a) CdS/WO <sub>3</sub> (25) and (b) CdS/SnO <sub>2</sub> (25) heterostructures in the presence (grey color) and absence (red color) of DMPO as •O <sub>2</sub> <sup>-</sup> scavenger.....                                                                                                                                                                                 | 8  |
| <b>Figure S8.</b> Product analysis through HPLC for selective oxidation from HMF to FDCA via DFF. ....                                                                                                                                                                                                                                                                                                                             | 9  |
| <b>Figure S9.</b> Photocatalytic HMF-decomposition degradation data over 10 cycles using CdS/WO <sub>3</sub> (n) and CdS/SnO <sub>2</sub> (n) heterostructure systems (n = WO <sub>3</sub> or SnO <sub>2</sub> wt.%). ....                                                                                                                                                                                                         | 10 |
| <b>Figure S10.</b> Comparison of Photocatalytic activities between heterostructure and physically mixed components.                                                                                                                                                                                                                                                                                                                |    |
| <b>Figure S11.</b> PCD activities of benzyl alcohol (BA) for (a) CdS/WO <sub>3</sub> (n) and (b) CdS/SnO <sub>2</sub> (n) heterostructures and the yield of the end product, benzaldehyde (BAD), from BA for (c) CdS/WO <sub>3</sub> (n) and (d) CdS/SnO <sub>2</sub> (n) heterostructures with varying ratios, under at 445 nm irradiation over 24 h (n = WO <sub>3</sub> or SnO <sub>2</sub> wt.%). ....                         | 11 |
| <b>Figure S12.</b> Confirmation of the photocatalytic reactivity of the CdS/WO <sub>3</sub> (50) heterostructure system using <i>in-situ</i> XPS.....                                                                                                                                                                                                                                                                              | 12 |
| <b>Figure S13.</b> Photocatalytic conversion activities of (a) HMF and (b) BA for CdS–WO <sub>3</sub> (n) mixed samples. Yield of the end product, (c) FDCA from HMF and (d) BAD from BA, for CdS–WO <sub>3</sub> (n) mixed samples with varying ratios under 445 nm irradiation over 24 h. * The bar (–) indicates physical mixing between CdS and WO <sub>3</sub> NPs (n = WO <sub>3</sub> or SnO <sub>2</sub> wt.%)... ..       | 13 |
| <b>Figure S14.</b> (a) Cd 3d, (b) S 2p, (c) W 4f, and (d) O 1s core-level X-ray photoelectron spectra of CdS–WO <sub>3</sub> (n) mixed samples. Colors indicate the ratio between the two heterostructures: n = 0 (black), n = 25 (red), n = 50 (blue), n = 75 (orange), and n = 100 (olive). * The bar (–) indicates physical mixing between CdS and WO <sub>3</sub> NPs (n = WO <sub>3</sub> or SnO <sub>2</sub> wt.%).<br>..... | 14 |
| <b>Table S1.</b> Specific surface area S <sub>BET</sub> of CdS/WO <sub>3</sub> (n) and CdS/SnO <sub>2</sub> (n) heterostructures, as a function of ratio, using BET analysis (n = WO <sub>3</sub> or SnO <sub>2</sub> wt.%).<br>.....                                                                                                                                                                                              | 15 |

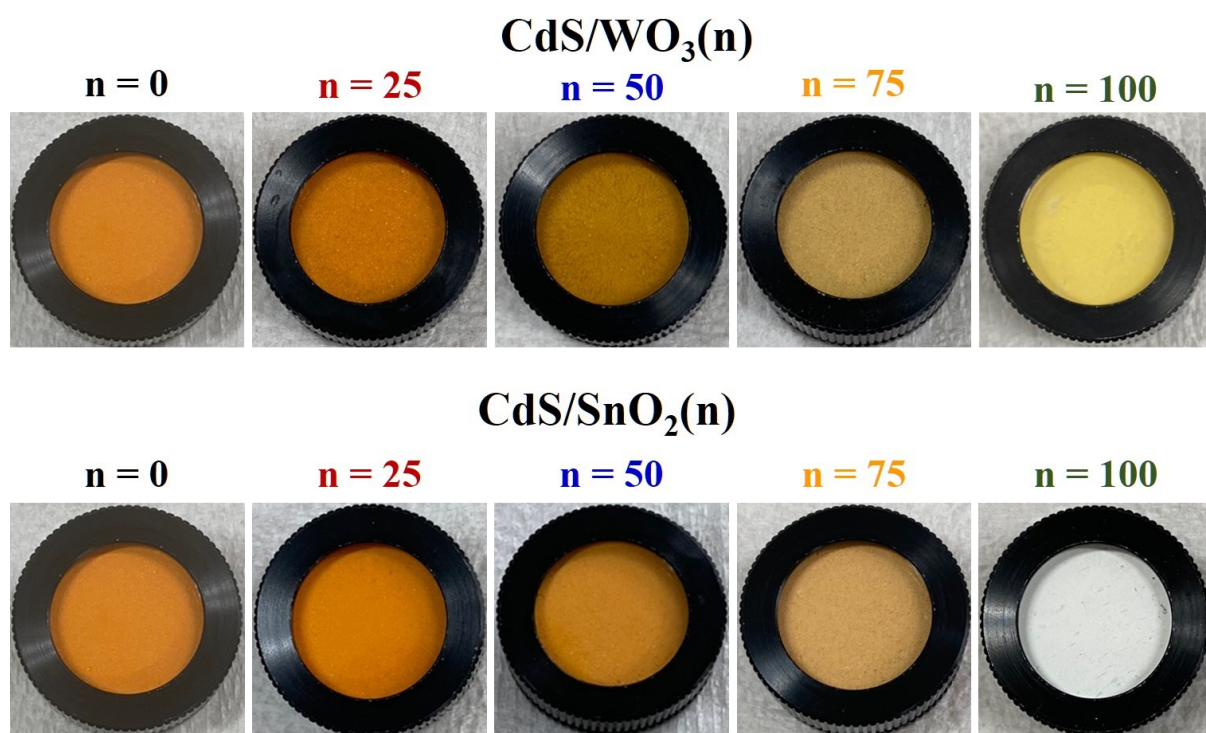

**Figure S1.** The samples of fabricated CdS/WO<sub>3</sub>(n) and CdS/SnO<sub>2</sub>(n) heterostructures (n = WO<sub>3</sub> or SnO<sub>2</sub> wt.%).

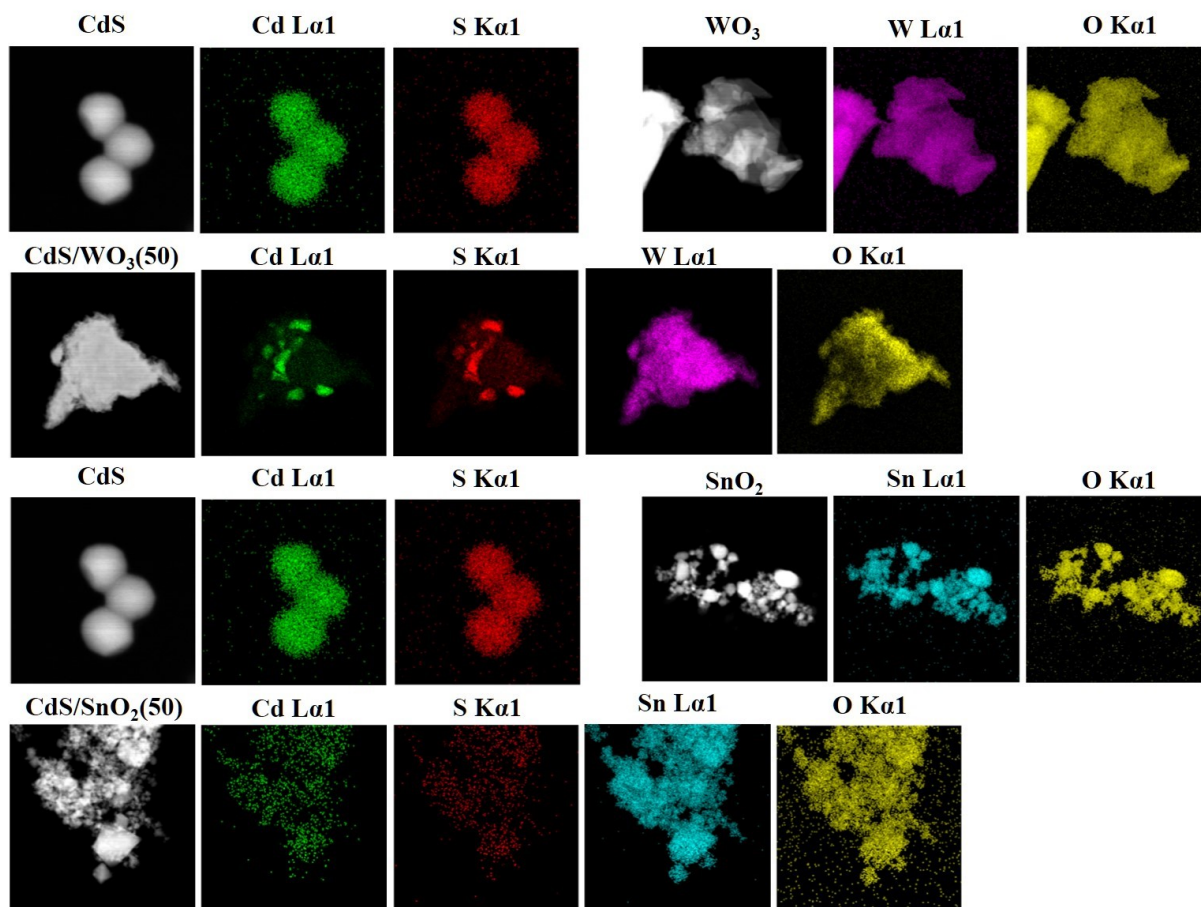

**Figure S2.** Energy-dispersive X-ray images of CdS/WO<sub>3</sub>(50) and CdS/SnO<sub>2</sub>(50) heterostructure systems.

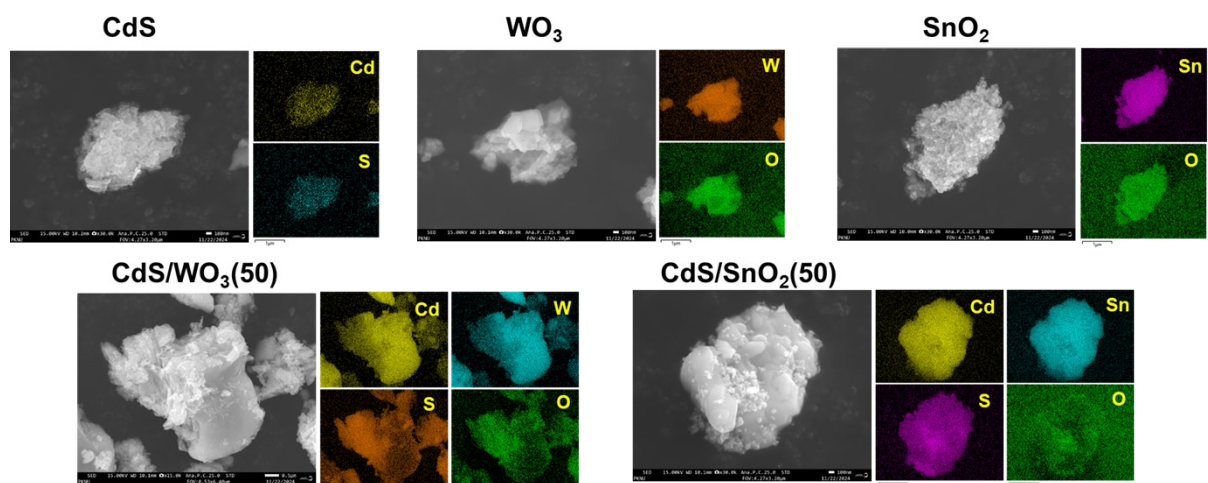

**Figure S3.** SEM Image and their EDS mapping of CdS, WO<sub>3</sub>, SnO<sub>2</sub>, CdS/WO<sub>3</sub>(50), and CdS/SnO<sub>2</sub>(50).

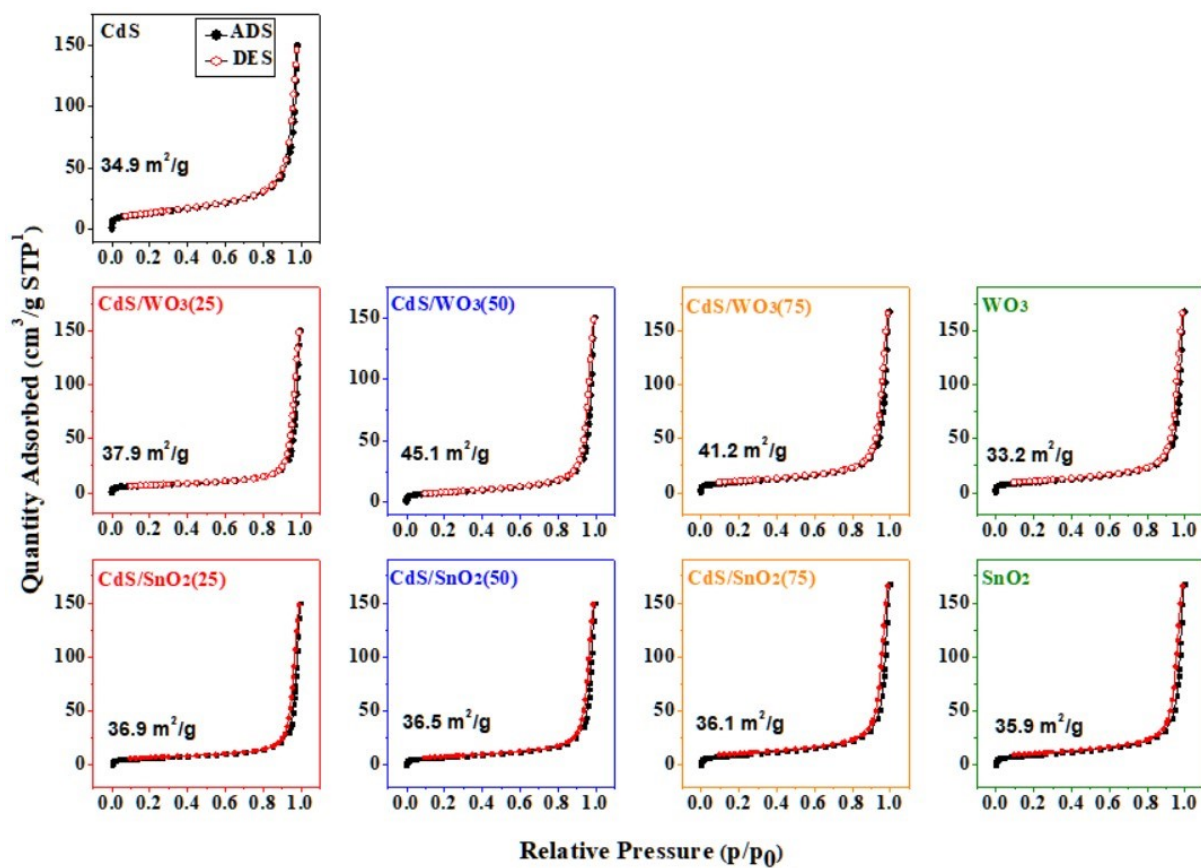

**Figure S4.** Brunauer-Emmett-Teller analysis of CdS/WO<sub>3</sub>(n) and CdS/SnO<sub>2</sub>(n) heterostructure systems (n = WO<sub>3</sub> or SnO<sub>2</sub> wt.%).

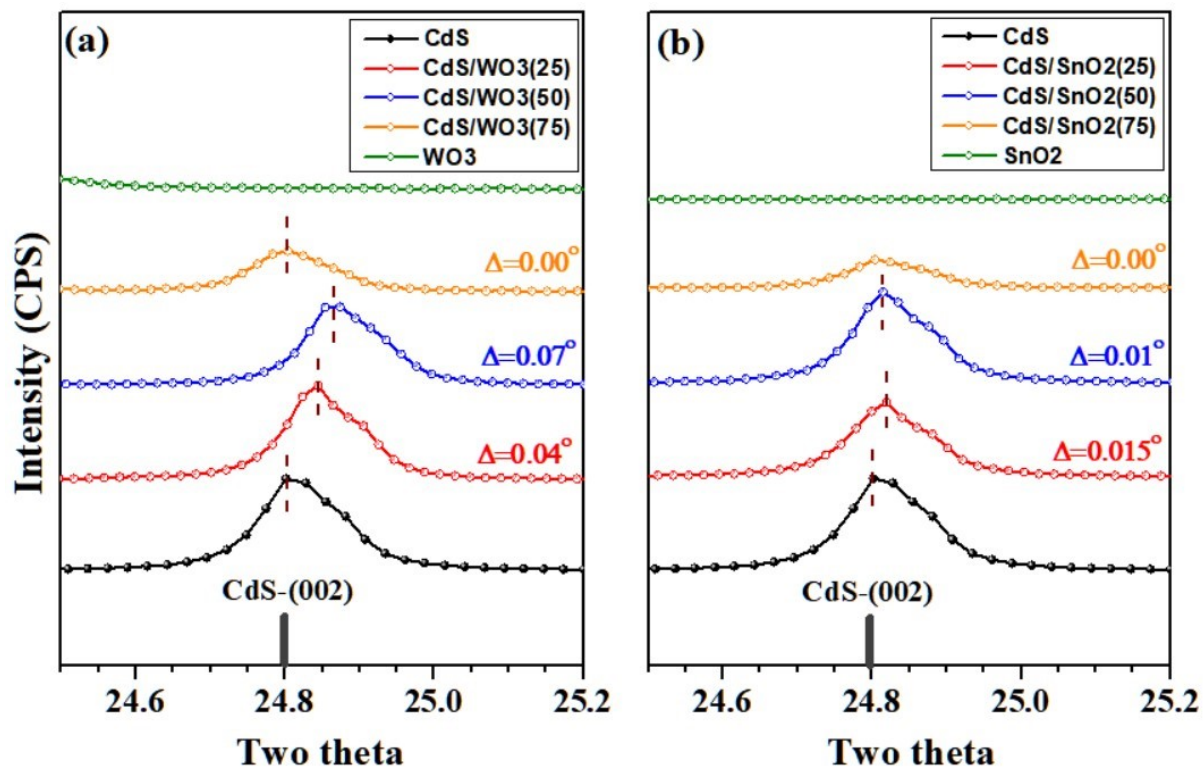

**Figure S5.** Small-angle XRD patterns of (a) CdS/WO<sub>3</sub>(n) and (b) CdS/SnO<sub>2</sub>(n) heterostructure systems (n = WO<sub>3</sub> or SnO<sub>2</sub> wt.%).

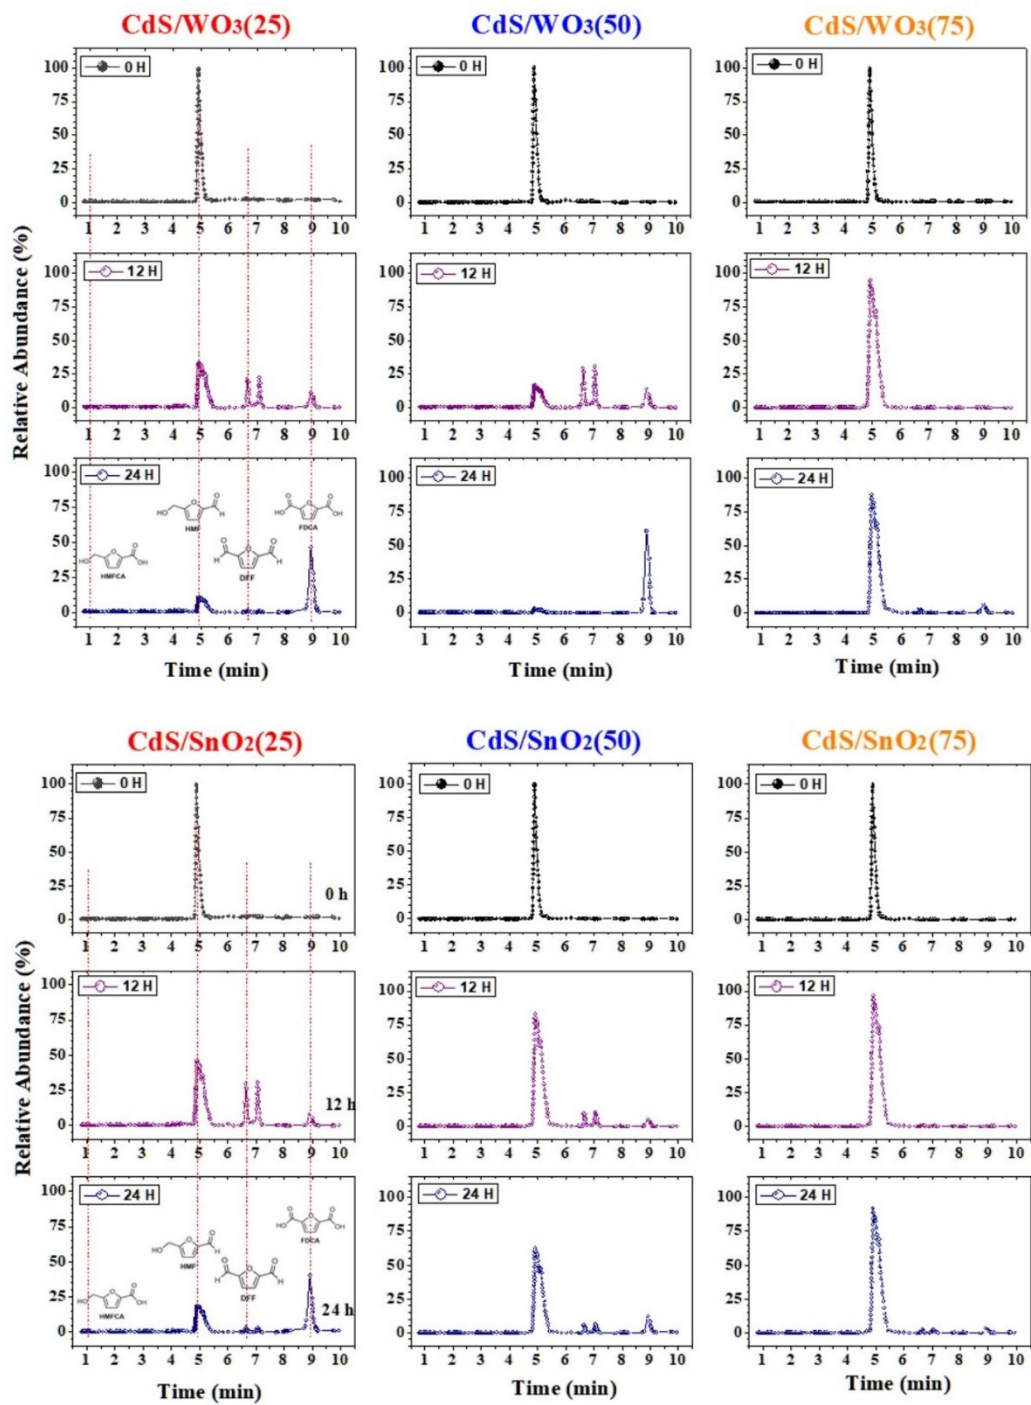

Figure S6. LC-MS results of CdS/WO<sub>3</sub>(n) and CdS/SnO<sub>2</sub>(n) heterostructure systems.



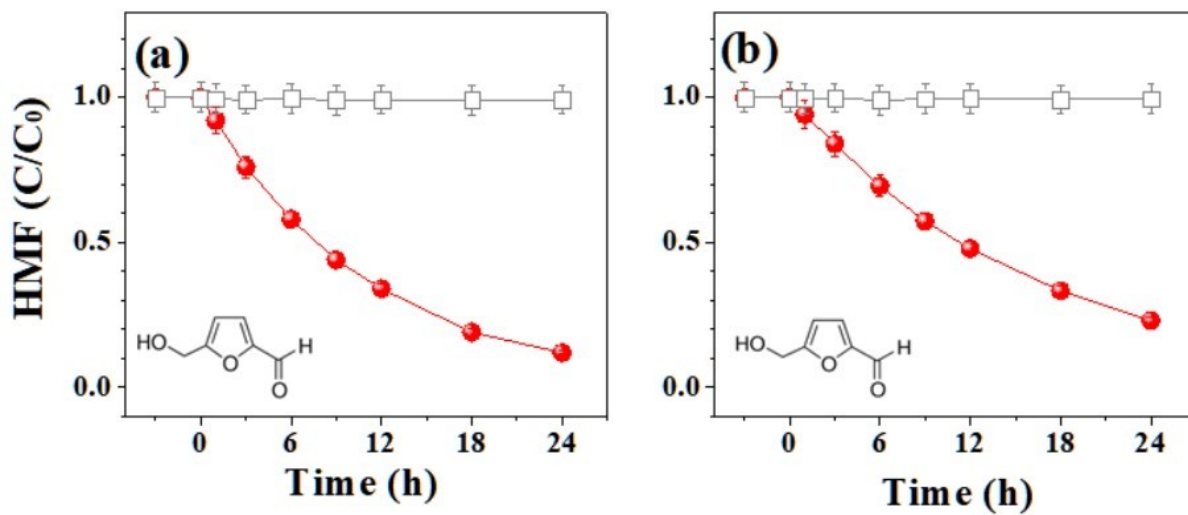

**Figure S7.** Photocatalytic degradation of HMF by (a) CdS/WO<sub>3</sub>(25) and (b) CdS/SnO<sub>2</sub>(25) heterostructures in the presence (grey color) and absence (red color) of DMPO as  $\bullet O_2^-$ -scavenger.

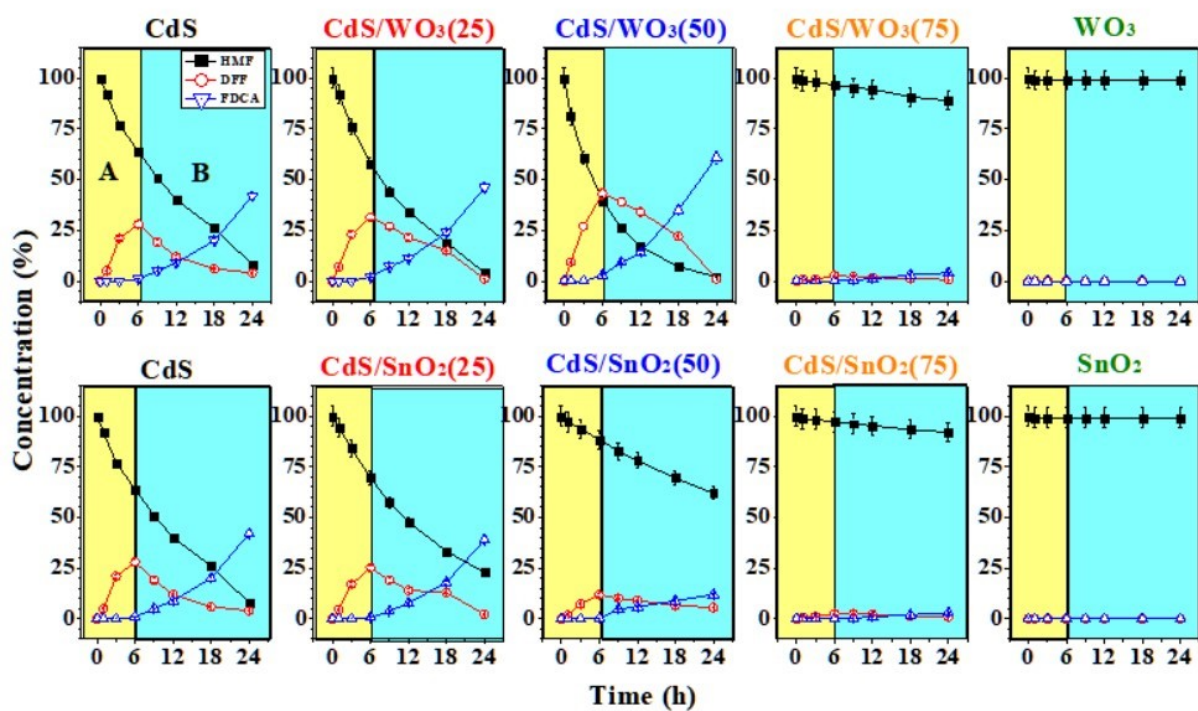

Figure S8. Product analysis through HPLC for selective oxidation from HMF to FDCA via DFF.

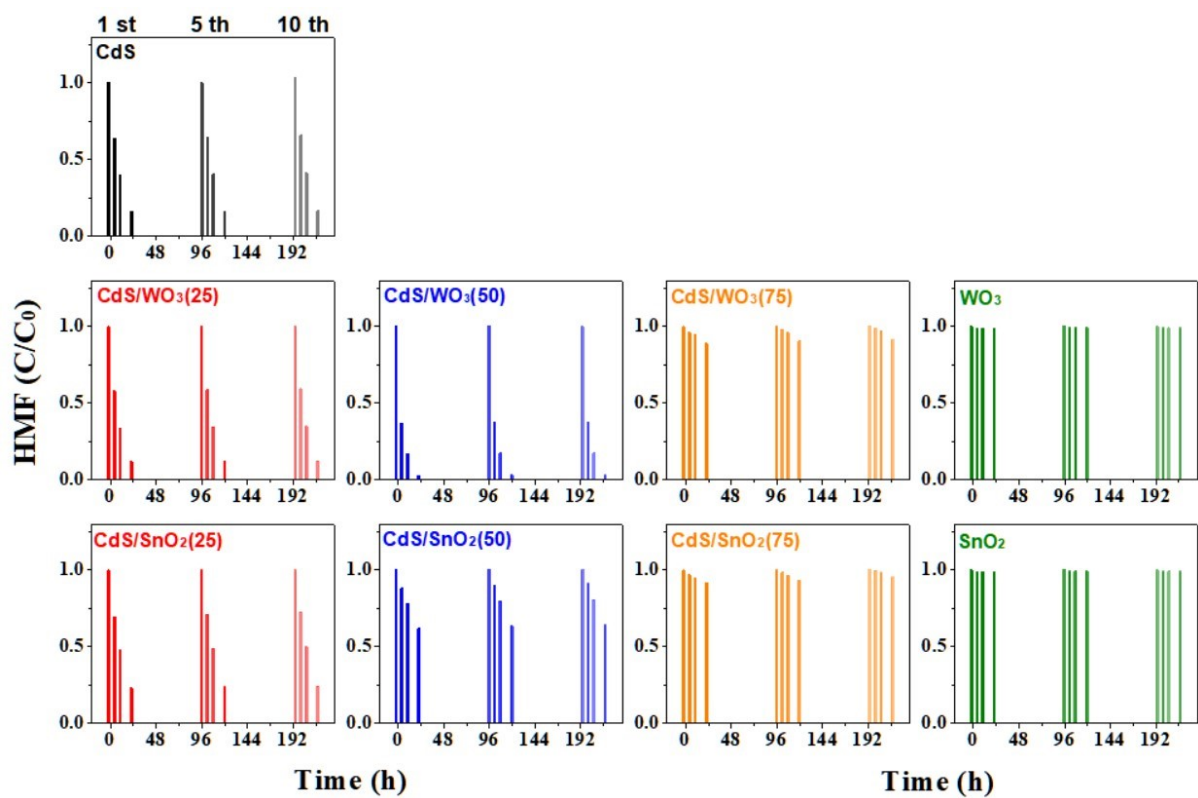

**Figure S9.** Photocatalytic HMF-decomposition degradation data over 10 cycles using CdS/WO<sub>3</sub>(n) and CdS/SnO<sub>2</sub>(n) heterostructure systems (n = WO<sub>3</sub> or SnO<sub>2</sub> wt.%).

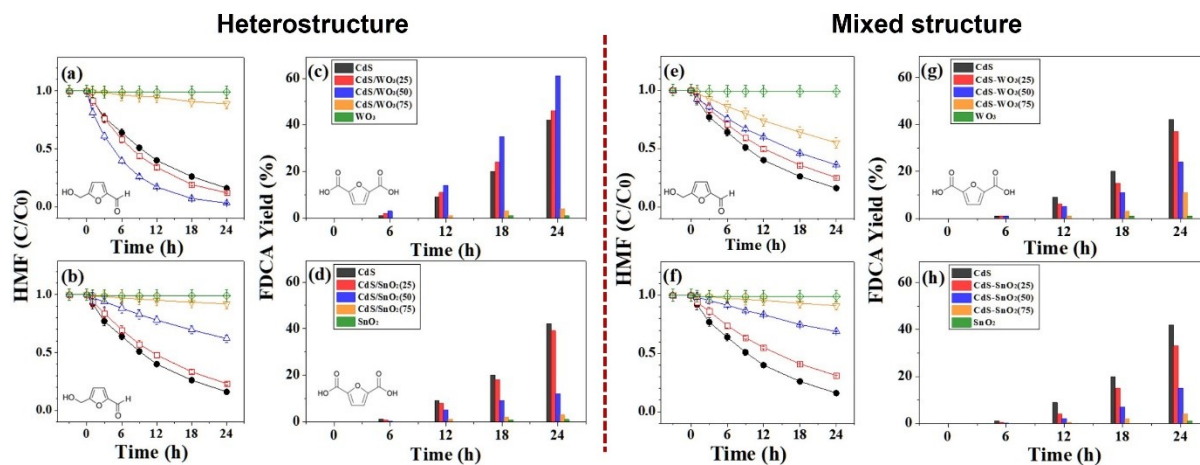

**Figure S10.** Comparison of Photocatalytic activities between heterostructure and physically mixed components. [Key: black—CdS; red—CdS/WO<sub>3</sub>(25) and CdS/SnO<sub>2</sub>(25) ; blue— CdS/WO<sub>3</sub>(50) and CdS/SnO<sub>2</sub>(50); orange— CdS/WO<sub>3</sub>(75) and CdS/SnO<sub>2</sub>(75); and green—WO<sub>3</sub> and SnO<sub>2</sub>.].

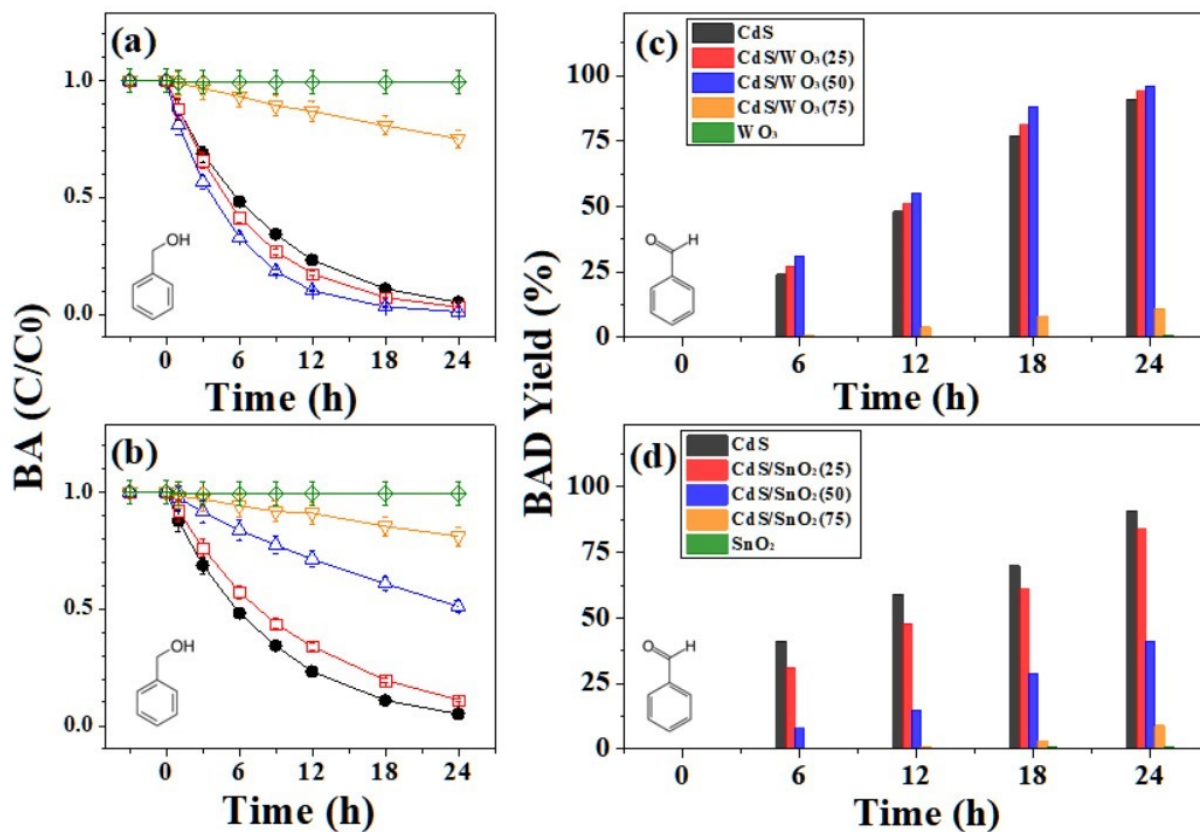

**Figure S11.** PCD activities of benzyl alcohol (BA) for (a) CdS/WO<sub>3</sub>(n) and (b) CdS/SnO<sub>2</sub>(n) heterostructures. [Key: black—CdS; red—CdS/WO<sub>3</sub>(25) and CdS/SnO<sub>2</sub>(25); blue—CdS/WO<sub>3</sub>(50) and CdS/SnO<sub>2</sub>(50); orange—CdS/WO<sub>3</sub>(75) and CdS/SnO<sub>2</sub>(75); and green—WO<sub>3</sub> and SnO<sub>2</sub>.]. The yield of the end product, benzaldehyde (BAD), from BA for (c) CdS/WO<sub>3</sub>(n) and (d) CdS/SnO<sub>2</sub>(n) heterostructures with varying ratios, under at 445 nm irradiation over 24 h (n = WO<sub>3</sub> or SnO<sub>2</sub> wt.%).

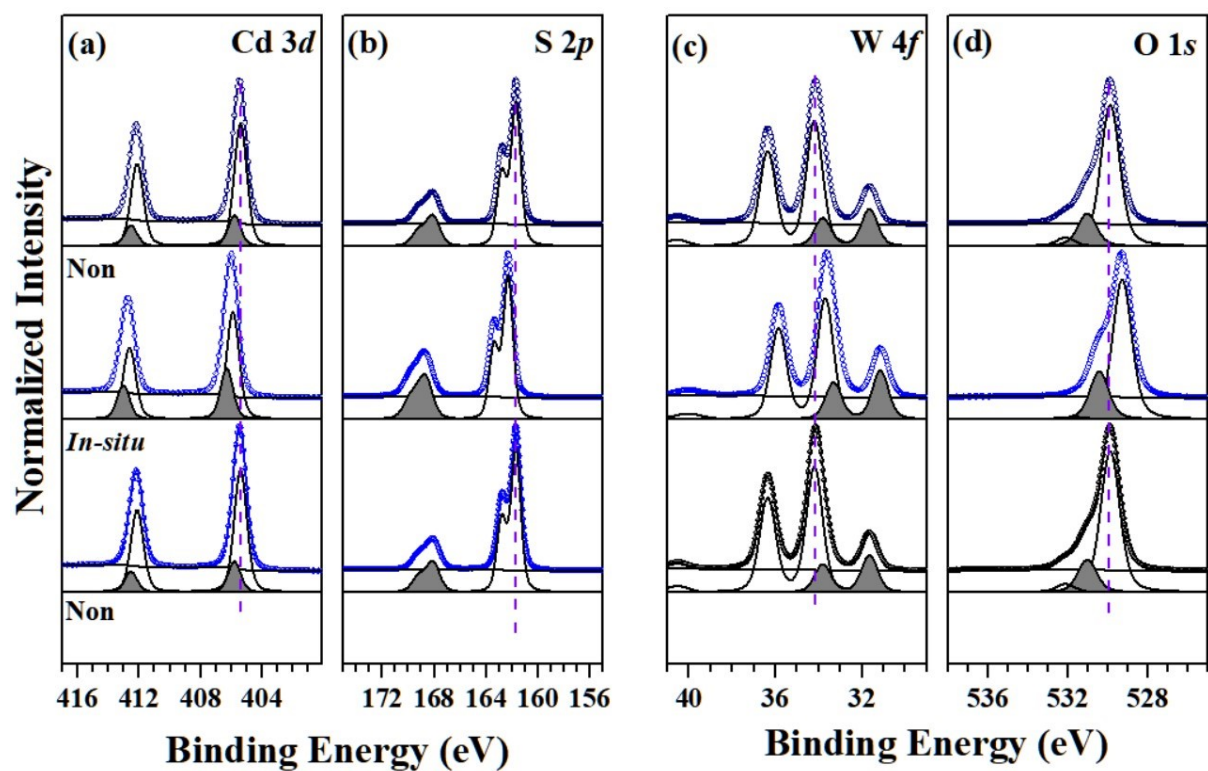

**Figure S12.** Confirmation of the photocatalytic reactivity of the CdS/WO<sub>3</sub>(50) heterostructure system using *in-situ* XPS.

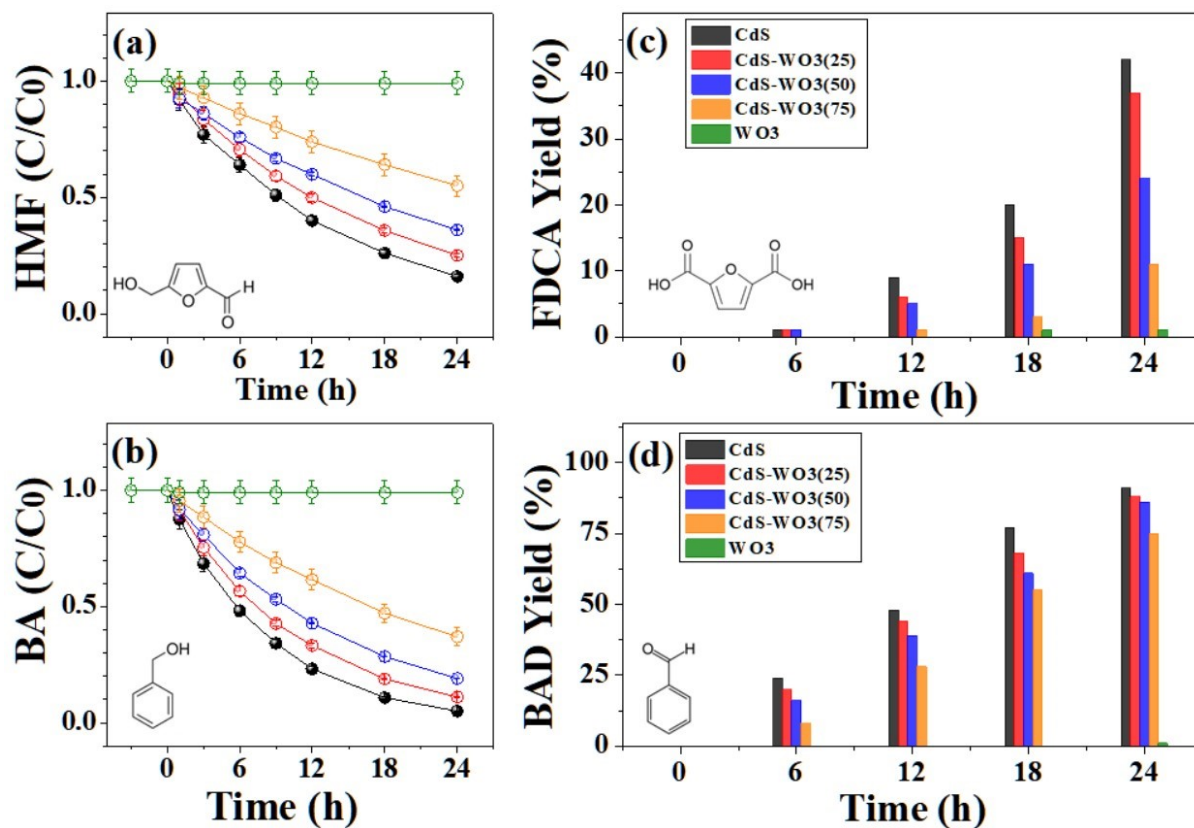

**Figure S13.** Photocatalytic conversion activities of (a) HMF and (b) BA for CdS–WO<sub>3</sub>(n) mixed samples. Yield of the end product, (c) FDCA from HMF and (d) BAD from BA, for CdS–WO<sub>3</sub>(n) mixed samples with varying ratios under 445 nm irradiation over 24 h. \* The bar (–) indicates physical mixing between CdS and WO<sub>3</sub> NPs (n = WO<sub>3</sub> or SnO<sub>2</sub> wt.%).

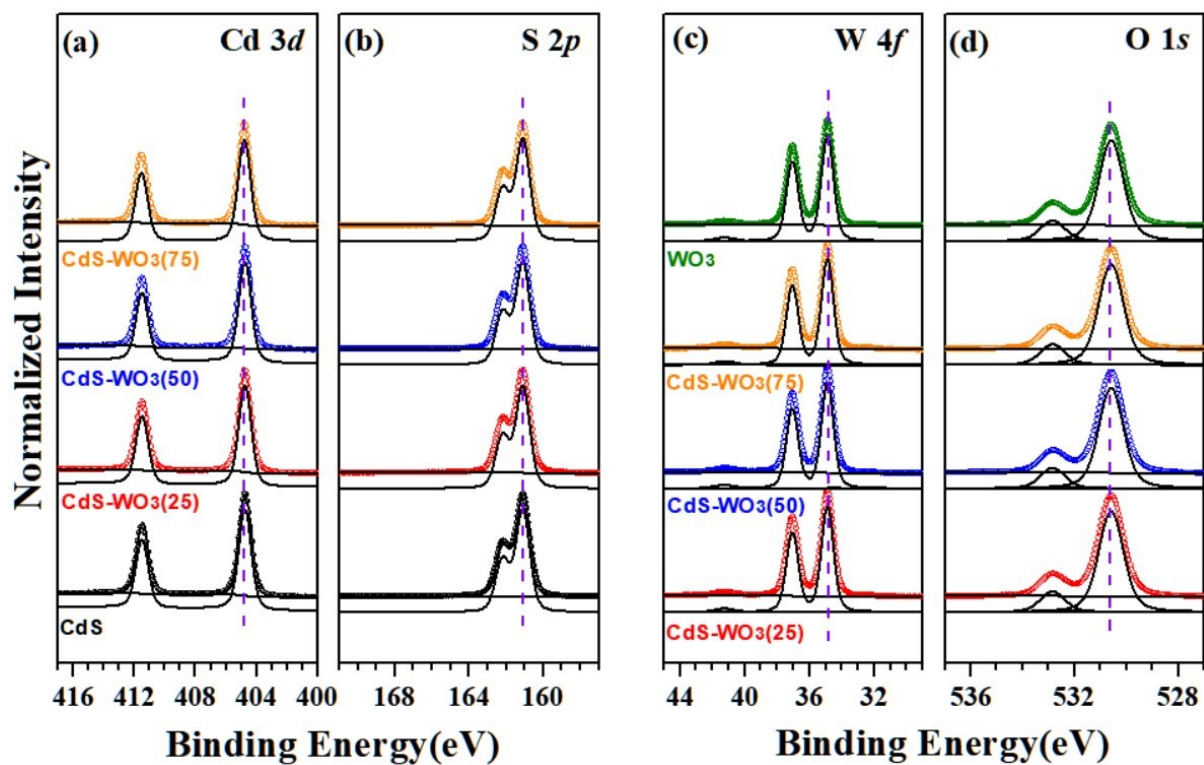

**Figure S14.** (a) Cd 3*d*, (b) S 2*p*, (c) W 4*f*, and (d) O 1*s* core-level X-ray photoelectron spectra of CdS–WO<sub>3</sub>(*n*) mixed samples. Colors indicate the ratio between the two heterostructures: *n* = 0 (black), *n* = 25 (red), *n* = 50 (blue), *n* = 75 (orange), and *n* = 100 (olive). \* The bar (–) indicates physical mixing between CdS and WO<sub>3</sub> NPs (*n* = WO<sub>3</sub> or SnO<sub>2</sub> wt.%).



**Table S1.** Specific surface area  $S_{\text{BET}}$  of CdS/WO<sub>3</sub>(n) and CdS/SnO<sub>2</sub>(n) heterostructures, as a function of ratio, using BET analysis (n = WO<sub>3</sub> or SnO<sub>2</sub> wt.%).

|                                      |             |                           |                           |                           |                  |
|--------------------------------------|-------------|---------------------------|---------------------------|---------------------------|------------------|
| Samples                              | CdS         | CdS/WO <sub>3</sub> (25)  | CdS/WO <sub>3</sub> (50)  | CdS/WO <sub>3</sub> (75)  | WO <sub>3</sub>  |
| $S_{\text{BET}}$ (m <sup>2</sup> /g) | 34.9        | 37.9                      | <b>45.1</b>               | 41.2                      | 33.2             |
| Samples                              | CdS         | CdS/SnO <sub>2</sub> (25) | CdS/SnO <sub>2</sub> (50) | CdS/SnO <sub>2</sub> (75) | SnO <sub>2</sub> |
| $S_{\text{BET}}$ (m <sup>2</sup> /g) | <b>34.9</b> | 36.9                      | 36.5                      | 36.1                      | 35.9             |
